# Supplementary material for: Effect of screening for type 2 diabetes on healthcare costs: a register-based study among 139,075 individuals diagnosed with diabetes in Denmark between 2001 and 2009
Source: Springer Nature journal article supplement (doi:10.1007/s00125-018-4594-2), 2018-03-16
Supplement: MOESM1 [file 15542004]

**ESM Table 1** Results from difference in difference regression analyses for prediction of costs per patient with incident diabetes in four healthcare sectors: pharmaceuticals, primary care, inpatient and outpatient.<sup>a</sup>

|                                             | (1)<br>Pharma-<br>ceuticals | (2)<br>Primary care   | (3)<br>Inpatient        | (4)<br>Outpatient     |
|---------------------------------------------|-----------------------------|-----------------------|-------------------------|-----------------------|
| Constant                                    | 887.34***<br>(3.47)         | 982.14***<br>(2.92)   | 11626.52***<br>(175.17) | 2391.02***<br>(30.36) |
| Time from diabetes diagnosis                |                             |                       |                         |                       |
| ≥3 year before diagnosis                    | -199.72***<br>(2.90)        | -396.17***<br>(-2.06) |                         |                       |
| 2 year before diagnosis                     | -118.41***<br>(3.74)        | -319.61***<br>(2.59)  | -3607.19***<br>(235.63) | -653.02***<br>(44.35) |
| 1 year before diagnosis                     | -81.88***<br>(3.72)         | 241.77***<br>(2.58)   | -2598.90***<br>(208.31) | -498.44***<br>(37.66) |
| 1 year after diagnosis                      | 65.26***<br>(3.80)          | -51.90***<br>(2.73)   | -652.58**<br>(198.60)   | -15.51<br>(31.73)     |
| 2 year after diagnosis                      | 81.69***<br>(3.94)          | -33.01***<br>(2.81)   | -870.50***<br>(181.63)  | -52.69<br>(31.88)     |
| 3 year after diagnosis                      | 97.66***<br>(4.04)          | -5.50<br>(2.86)       | -668.52***<br>(178.06)  | 9.74<br>(30.93)       |
| 4 year after diagnosis                      | 132.39***<br>(4.46)         | 12.54***<br>(3.03)    | -679.50***<br>(174.77)  | 18.31<br>(31.03)      |
| 5 year after diagnosis                      | 173.83***<br>(4.77)         | 34.34***<br>(3.27)    | -370.01*<br>(180.58)    | 85.91**<br>(32.18)    |
| ≥6 year after diagnosis                     | 266.57***<br>(3.71)         | 104.02***<br>(2.56)   | 480.73**<br>(154.17)    | 346.20***<br>(27.27)  |
| Intervention                                | -62.76***<br>(7.27)         | -31.40***<br>(5.68)   | -404.45<br>(459.96)     | -38.08<br>(80.52)     |
| Intervention × Time from diabetes diagnosis |                             |                       |                         |                       |
| Intervention × ≥3 year before diagnosis     | 47.11***<br>(8.39)          | 12.86*<br>(6.24)      |                         |                       |
| Intervention × 2 year before diagnosis      | 25.03*<br>(10.71)           | 5.35<br>(7.89)        | 533.23<br>(794.99)      | -11.05<br>(153.28)    |
| Intervention × 1 year before diagnosis      | 19.03<br>(10.40)            | -0.66<br>(7.75)       | 968.56<br>(764.68)      | -122.00<br>(115.56)   |
| Intervention × 1 year after diagnosis       | -0.43<br>(10.75)            | -28.70***<br>(8.20)   | -876.52<br>(574.95)     | -67.89<br>(107.26)    |
| Intervention × 2 year after diagnosis       | -4.72<br>(10.92)            | -24.93**<br>(8.47)    | 185.56<br>(596.03)      | -12.74<br>(107.06)    |
| Intervention × 3 year after diagnosis       | -14.89<br>(10.96)           | -30.94***<br>(8.55)   | 787.90<br>(591.90)      | -58.40<br>(99.70)     |
| Intervention × 4 year after diagnosis       | -23.75*<br>(10.96)          | -20.91*<br>(8.55)     | 322.78<br>(591.90)      | -84.89<br>(99.70)     |

|                                        |           |         |          |          |
|----------------------------------------|-----------|---------|----------|----------|
|                                        | (11.53)   | (8.98)  | (580.98) | (100.83) |
| Intervention × 5 year after diagnosis  | -46.26*** | -16.44  | -283.39  | -63.10   |
|                                        | (11.95)   | (9.55)  | (567.63) | (104.15) |
| Intervention × ≥6 year after diagnosis | -70.44*** | 10.45   | 263.10   | -69.69   |
|                                        | (9.88)    | (7.49)  | (505.22) | (89.53)  |
| <hr/>                                  |           |         |          |          |
| N                                      | 1474572   | 1552612 | 166754   | 488251   |
| R <sup>2</sup>                         | 0.043     | 0.095   | 0.012    | 0.010    |
| adj. R <sup>2</sup>                    | 0.043     | 0.095   | 0.011    | 0.010    |

<sup>a</sup> Regressions (1) and (2) results are based on 2001-2012 data; regressions (3) and (4) are based on 2007-2012 data. All regressions were mean adjusted for age, sex, education, as well as prevalence of IHD, cancer and stroke at diagnosis; and GP county. The categorical covariates (sex, education, IHD, cancer, stroke and GP county) were effects coded.

Robust standard errors in parentheses.

\*p<0.05, \*\*p<0.01, \*\*\*p<0.001
